# Supplementary material for: In-Line Monitoring of Polyhydroxyalkanoate (PHA) Production during High-Cell-Density Plant Oil Cultivations Using Photon Density Wave Spectroscopy
Source: Bioengineering (Basel). 2019 Sep 19;6(3):85. doi: 10.3390/bioengineering6030085 (PMC6783927; doi:10.3390/bioengineering6030085)
Supplement: Supplementary file 1 [file bioengineering-06-00085-s001.pdf]

Supplementary Materials

Article

# In-Line Monitoring of Polyhydroxyalkanoate (PHA) Production during High-Cell-Density Plant Oil Cultivations Using Photon Density Wave Spectroscopy

Björn Gutschmann <sup>1</sup>, Thomas Schiewe <sup>2</sup>, Manon T. H. Weiske <sup>1</sup>, Peter Neubauer <sup>1</sup>, Roland Hass <sup>2</sup>, Sebastian L. Riedel <sup>1</sup>, \*

<sup>1</sup> Bioprocess Engineering, Department of Biotechnology, Technische Universität Berlin, Ackerstraße 76, 13355 Berlin, Germany

<sup>2</sup> innoFSPEC, University of Potsdam, Am Mühlenberg 3, 14476 Potsdam, Germany

\* Correspondence: riedel@tu-berlin.de

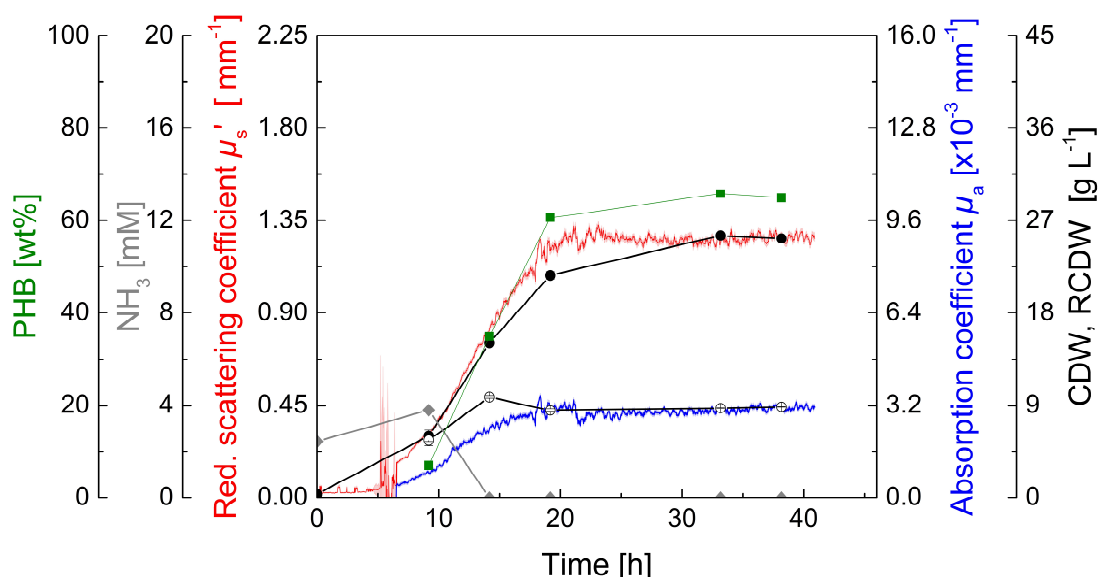

**Figure S1.** Batch 1, cultivation for PHB production by *R. eutropha* H16 using 3% (w v<sup>-1</sup>) rapeseed oil and 2.25 g L<sup>-1</sup> urea as the carbon and nitrogen sources, respectively. Ammonia content (grey diamonds, mM), PHB content (green squares, wt%), CDW (filled circles, g L<sup>-1</sup>), RCDW (empty circles, g L<sup>-1</sup>), reduced scattering coefficient  $\mu_s'$  (red line, mm<sup>-1</sup>) and absorption coefficient  $\mu_a$  (blue line, x10<sup>-3</sup> mm<sup>-1</sup>) are shown.

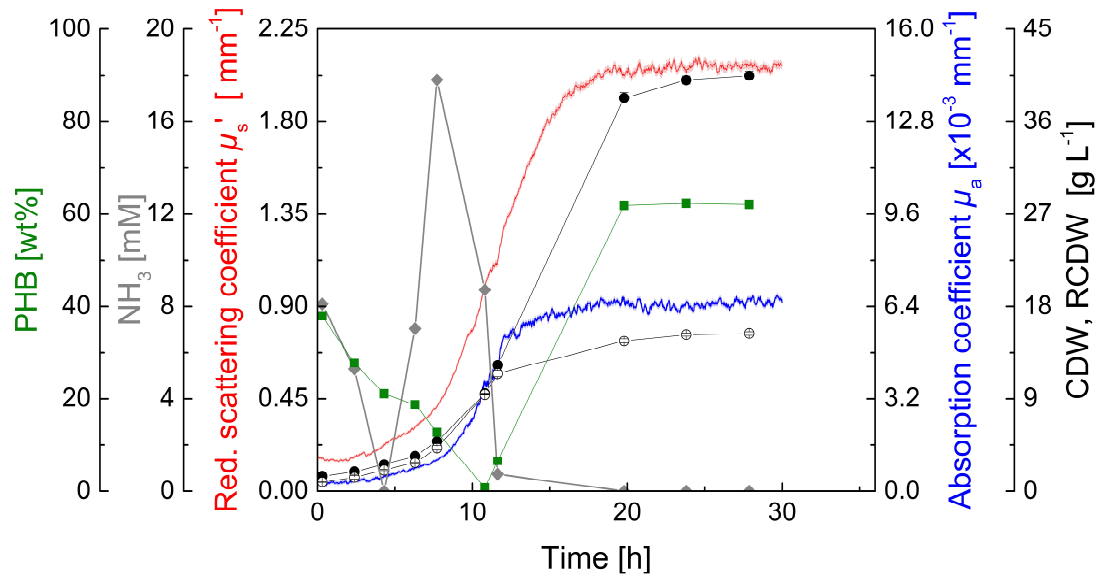

**Figure S2.** Batch 2, cultivation for PHB production by *R. eutropha* H16 using 4% ( $\text{w v}^{-1}$ ) rapeseed oil and  $4.5 \text{ g L}^{-1}$  urea as the carbon and nitrogen sources, respectively. Ammonia content (grey diamonds, mM), PHB content (green squares, wt%), CDW (filled circles,  $\text{g L}^{-1}$ ), RCDW (empty circles,  $\text{g L}^{-1}$ ), reduced scattering coefficient  $\mu'_s$  (red line,  $\text{mm}^{-1}$ ) and absorption coefficient  $\mu_a$  (blue line,  $\times 10^{-3} \text{mm}^{-1}$ ) are shown.

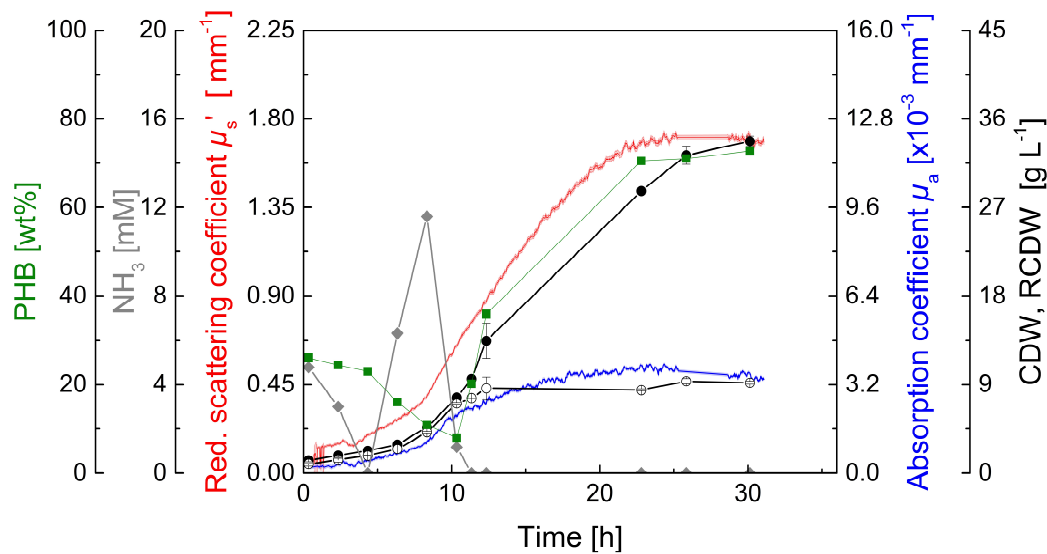

**Figure S3.** Batch 3, cultivation for PHB production by *R. eutropha* H16 using 4% ( $\text{w v}^{-1}$ ) rapeseed oil and  $2.25 \text{ g L}^{-1}$  urea as the carbon and nitrogen sources, respectively. Ammonia content (grey diamonds, mM), PHB content (green squares, wt%), CDW (filled circles,  $\text{g L}^{-1}$ ), RCDW (empty circles,  $\text{g L}^{-1}$ ), reduced scattering coefficient  $\mu'_s$  (red line,  $\text{mm}^{-1}$ ) and absorption coefficient  $\mu_a$  (blue line,  $\times 10^{-3} \text{mm}^{-1}$ ) are shown.

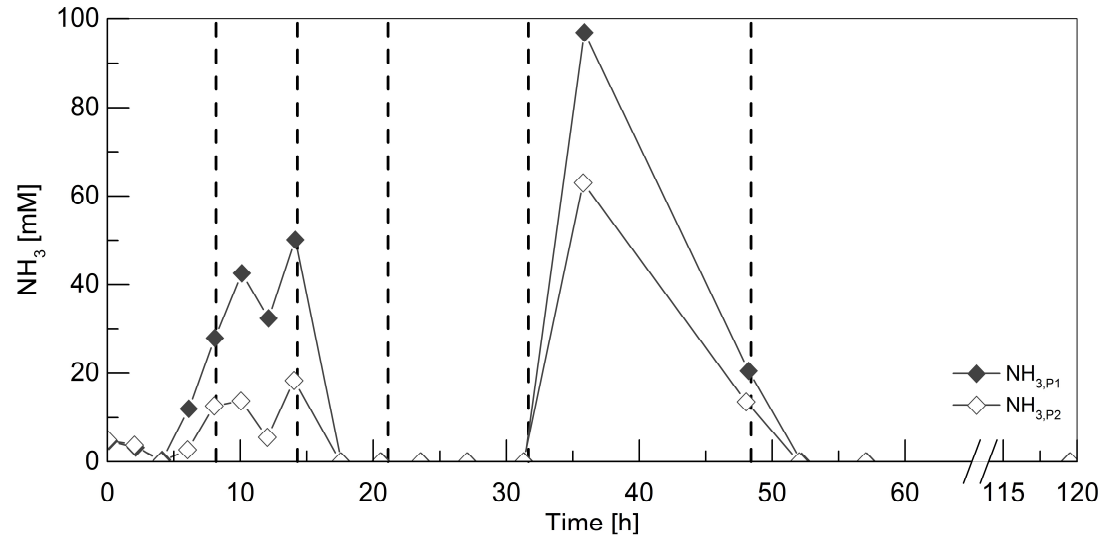

**Figure S4.** Ammonia contents from the pulse feed cultivations. The cultures were initially started with 0.5% (w v<sup>-1</sup>) rapeseed oil and 150 mM nitrogen (4.5 g L<sup>-1</sup> urea). The dashed vertical lines represent time points of pulse addition: 0.5% (w v<sup>-1</sup>) rapeseed oil at 8.2 h, 1% (w v<sup>-1</sup>) rapeseed oil at 14.3 h, 2% (w v<sup>-1</sup>) rapeseed oil at 21.1 h, 0.5% (w v<sup>-1</sup>) rapeseed oil at 8.2 h, a bolus (110 mL urea solution (122 g L<sup>-1</sup>), 15.6 mL 0.5 M K<sub>2</sub>SO<sub>4</sub>, 30 mL 0.32 M MgSO<sub>4</sub>, 30 mL 0.042 mM CaCl<sub>2</sub> and 3 mL trace element solution) at 31.7 h and 4% (w v<sup>-1</sup>) rapeseed oil at 48.4 h. Ammonia contents from the reference experiment (dark grey, filled diamonds, mM) and the biological duplicate (dark grey, open diamonds, mM) are shown.
